# Supplementary material
Source: publisher figshare collection journal article supplement (https://acs.figshare.com/ndownloader/files/14776127)
Supplement: Supplementary file 1 [file 14776127]

# Supporting Information

## Enhancement of Recyclable pH-Responsive Lignin Grafted Phosphobetaine on Enzymatic Hydrolysis of Lignocelluloses

*Feiyun Li<sup>†</sup>, Cheng Cai<sup>†</sup>, Hongming Lou<sup>\*†</sup>, Yuxia Pang<sup>†</sup>, Xinyi Liu<sup>†</sup> and Xueqing*

*Qiu<sup>\*†, ‡</sup>*

<sup>†</sup> School of Chemistry and Chemical Engineering, Guangdong Provincial Engineering Research Center for Green Fine Chemicals, South China University of Technology, Guangzhou, 510641, PR China

<sup>‡</sup> State Key Laboratory of Pulp and Paper Engineering, South China University of Technology, Guangzhou, 510641, PR China

### Corresponding Author

\*E-mail: cehmlou@scut.edu.cn. Tel.: 86-20-87114722. Fax:+86-20-87114721.

\*E-mail: xueqingqiu66@163.com. Tel.: 86-20-87114722. Fax:+86-20-87114721.

Supporting Information contains 3 pages, 2 figures

The HRMS spectra of 3-chloro-2-hydroxypropyl(2-(trimethylammonio)ethyl)phosphate (Compound 3). Intermediate **compound 3** was characterized by maxis impact ultra-high resolution time-of-flight mass spectrometry (MS) using a spectrometer in electrospray ionization mode (Bruker Daltonics, Germany). HRMS:  $m/z$ (ESI), calculated  $[M + Na]^+$ : 298.0582, measured: 298.0582; calculated  $[M + Na + 2]^+$ : 300.0552, measured: 300.0554.

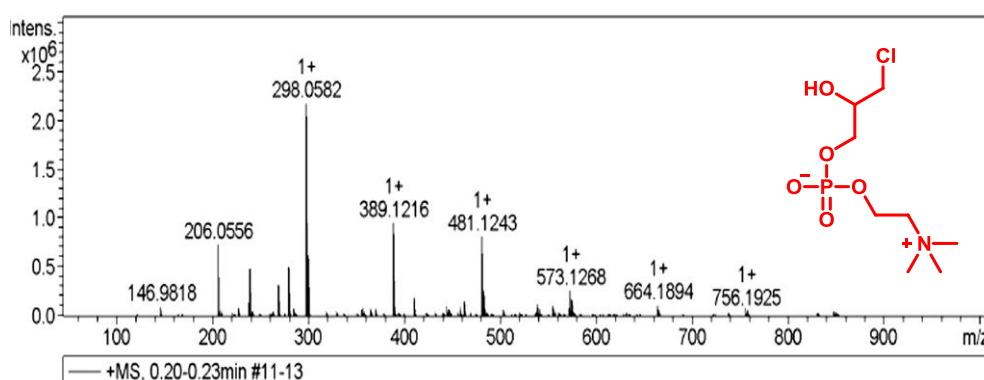

**Figure S1.** The HRMS spectra of the reaction suspension of including **compound 3**.

**The  $^{31}\text{P}$ PRMS spectra of EHLPB-210.** The chemical structure of EHLPB-210 was recorded with a Bruker AV 400 spectrometer (Bruker, Germany) in phosphorus-31 nuclear magnetic resonance  $^{31}\text{P}$ NMR in dimethyl sulfoxide- $\text{d}_6$ . The peak at  $\delta$  0.36 ppm was attributed to the P-O-C group of EHLPB-210.

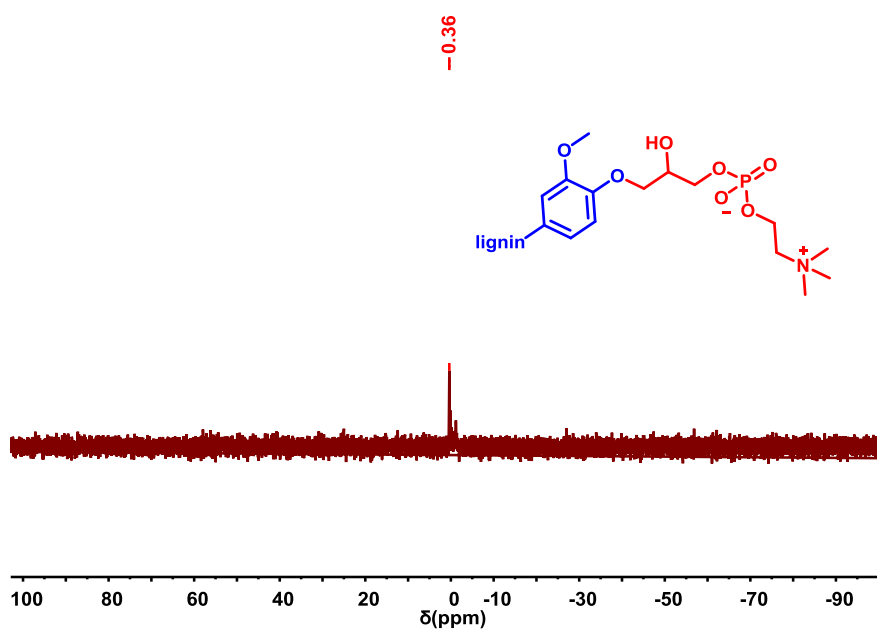

**Figure S2.** The  $^{31}\text{P}$ NMR spectra of EHLPB-210.
